# Supplementary material for: Timing Constraints of In Vivo Gag Mutations during Primary HIV-1 Subtype C Infection
Source: PubMed Central journal article supplement (PMC2768328; doi:10.1371/journal.pone.0007727), 2009-11-05
Supplement: pone.0007727.s001.pdf [file pone.0007727.s001.pdf]

Figure S1. Time points post seroconversion (p/s) and the number of sequences.

Color coding:

- 21 RNA sequences
- 21 DNA sequences
- 21 RNA + DNA sequences

| Patient ID | Abbreviated Code | Fiebig stage | Timepoints:  | 1st | 2nd | 3rd | 4th | 5th | 6th | 7th | 8th | 9th | 10th | Total number of sequences |
|------------|------------------|--------------|--------------|-----|-----|-----|-----|-----|-----|-----|-----|-----|------|---------------------------|
| B001729-5  | NA               | V-VI         | days p/s     | 169 | 231 | 354 | 448 |     |     |     |     |     |      | 42                        |
|            |                  |              | sequences, n | 9   | 9   | 8   | 16  |     |     |     |     |     |      |                           |
| B001811-6  | A                | II           | days p/s     | 6   | 22  | 27  | 55  | 83  | 97  | 111 | 147 | 266 | 356  | 73                        |
|            |                  |              | sequences, n | 6   | 10  | 6   | 6   | 5   | 15  | 6   | 5   | 6   | 8    |                           |
| B002381-4  | OC               | IV           | days p/s     | 27  | 86  | 208 | 300 | 393 | 482 |     |     |     |      | 84                        |
|            |                  |              | sequences, n | 16  | 15  | 10  | 18  | 19  | 6   |     |     |     |      |                           |
| B002530-1  | OE               | V            | days p/s     | 52  | 81  | 122 | 205 | 236 |     |     |     |     |      | 68                        |
|            |                  |              | sequences, n | 16  | 15  | 17  | 7   | 13  |     |     |     |     |      |                           |
| B002604-4  | OG               | V            | days p/s     | 104 | 163 | 194 | 219 | 317 |     |     |     |     |      | 60                        |
|            |                  |              | sequences, n | 18  | 8   | 14  | 12  | 8   |     |     |     |     |      |                           |
| B002761-0  | OJ               | IV           | days p/s     | 44  | 135 | 224 | 316 |     |     |     |     |     |      | 62                        |
|            |                  |              | sequences, n | 16  | 18  | 19  | 9   |     |     |     |     |     |      |                           |
| B002865-8  | B                | II           | days p/s     | 10  | 18  | 74  | 103 | 164 | 223 |     |     |     |      | 72                        |
|            |                  |              | sequences, n | 9   | 2   | 21  | 16  | 14  | 10  |     |     |     |      |                           |
| B002869-2  | OM               | V-VI         | days p/s     | 86  | 178 |     |     |     |     |     |     |     |      | 38                        |
|            |                  |              | sequences, n | 21  | 17  |     |     |     |     |     |     |     |      |                           |
| B002990-7  | OQ               | V            | days p/s     | 52  | 139 | 233 | 320 | 415 |     |     |     |     |      | 44                        |
|            |                  |              | sequences, n | 10  | 12  | 7   | 7   | 8   |     |     |     |     |      |                           |
| B003079-8  | OS               | V            | days p/s     | 62  | 153 | 243 | 326 | 411 | 494 |     |     |     |      | 73                        |
|            |                  |              | sequences, n | 10  | 21  | 12  | 6   | 17  | 7   |     |     |     |      |                           |
| B003091-0  | OU               | IV           | days p/s     | 13  | 44  | 104 | 196 | 289 | 349 | 471 |     |     |      | 106                       |
|            |                  |              | sequences, n | 10  | 13  | 10  | 36  | 10  | 17  | 10  |     |     |      |                           |
| B003234-6  | OW               | IV           | days p/s     | 13  | 105 | 224 | 288 | 382 | 469 |     |     |     |      | 67                        |
|            |                  |              | sequences, n | 8   | 23  | 13  | 12  | 6   | 5   |     |     |     |      |                           |
| B003251-8  | OX               | V            | days p/s     | 58  | 152 | 245 | 341 | 407 | 464 |     |     |     |      | 50                        |
|            |                  |              | sequences, n | 13  | 8   | 6   | 7   | 9   | 7   |     |     |     |      |                           |
| B003244-1  | OY               | V            | days p/s     | 51  | 143 | 233 | 328 | 391 | 423 |     |     |     |      | 23                        |
|            |                  |              | sequences, n | 2   | 2   | 9   | 5   | 1   | 4   |     |     |     |      |                           |
| B003285-7  | OZ               | V            | days p/s     | 78  | 170 | 261 | 280 | 326 | 395 |     |     |     |      | 63                        |
|            |                  |              | sequences, n | 17  | 20  | 8   | 9   | 7   | 2   |     |     |     |      |                           |
| B003312-8  | C                | II           | days p/s     | 4   | 95  | 109 | 201 | 292 | 325 | 445 |     |     |      | 143                       |
|            |                  |              | sequences, n | 36  | 22  | 16  | 37  | 8   | 9   | 15  |     |     |      |                           |
| B003354-0  | O1               | IV           | days p/s     | 6   | 94  | 185 | 243 | 312 |     |     |     |     |      | 43                        |
|            |                  |              | sequences, n | 10  | 7   | 12  | 8   | 6   |     |     |     |     |      |                           |
| B003390-6  | PA               | V            | days p/s     | 65  | 129 | 164 | 227 |     |     |     |     |     |      | 67                        |
|            |                  |              | sequences, n | 30  | 18  | 10  | 9   |     |     |     |     |     |      |                           |
| B003430-0  | E                | II           | days p/s     | 30  | 59  | 150 | 243 | 274 | 305 | 339 | 404 |     |      | 99                        |
|            |                  |              | sequences, n | 24  | 10  | 9   | 6   | 10  | 10  | 8   | 22  |     |      |                           |
| B003481-1  | PC               | V            | days p/s     | 54  | 146 | 236 | 333 | 388 | 418 |     |     |     |      | 80                        |
|            |                  |              | sequences, n | 28  | 10  | 6   | 10  | 17  | 9   |     |     |     |      |                           |
| B003505-9  | F                | II           | days p/s     | 7   | 70  | 98  | 203 | 261 | 323 | 447 |     |     |      | 45                        |
|            |                  |              | sequences, n | 7   | 1   | 8   | 6   | 7   | 4   | 12  |     |     |      |                           |
| B003508-7  | PD               | V            | days p/s     | 59  | 150 | 242 | 334 | 428 |     |     |     |     |      | 44                        |
|            |                  |              | sequences, n | 9   | 10  | 9   | 9   | 7   |     |     |     |     |      |                           |
| B003603-1  | G                | II           | days p/s     | 4   | 95  | 197 | 295 | 345 |     |     |     |     |      | 70                        |
|            |                  |              | sequences, n | 10  | 9   | 21  | 6   | 24  |     |     |     |     |      |                           |
| B004872-1  | PK               | V            | days p/s     | 47  | 108 | 135 | 195 |     |     |     |     |     |      | 40                        |
|            |                  |              | sequences, n | 7   | 17  | 7   | 9   |     |     |     |     |     |      |                           |
| B005018-8  | D                | II           | days p/s     | 6   | 103 | 148 | 177 | 301 | 393 | 483 |     |     |      | 82                        |
|            |                  |              | sequences, n | 29  | 7   | 7   | 9   | 11  | 11  | 8   |     |     |      |                           |
| B005062-7  | PO               | IV           | days p/s     | 6   | 34  | 97  | 193 | 277 |     |     |     |     |      | 44                        |
|            |                  |              | sequences, n | 10  | 10  | 5   | 11  | 8   |     |     |     |     |      |                           |
| B005065-5  | PP               | V            | days p/s     | 44  | 100 | 226 |     |     |     |     |     |     |      | 31                        |
|            |                  |              | sequences, n | 10  | 9   | 12  |     |     |     |     |     |     |      |                           |
| B005099-4  | QA               | IV           | days p/s     | 6   | 181 | 389 |     |     |     |     |     |     |      | 30                        |
|            |                  |              | sequences, n | 11  | 8   | 11  |     |     |     |     |     |     |      |                           |
| B005340-7  | QC               | V            | days p/s     | 80  | 235 | 415 |     |     |     |     |     |     |      | 38                        |
|            |                  |              | sequences, n | 10  | 21  | 7   |     |     |     |     |     |     |      |                           |

Figure S1 (continuing). Time points post seroconversion (p/s) and the number of sequences.

| Patient ID | Abbreviated Code | Fiebig stage | Timepoints:  | 1st | 2nd | 3rd | 4th | 5th | 6th | 7th | 8th | 9th | 10th | Total number of sequences |
|------------|------------------|--------------|--------------|-----|-----|-----|-----|-----|-----|-----|-----|-----|------|---------------------------|
| B005355-2  | QD               | V-VI         | days p/s     | 79  | 199 | 255 | 420 |     |     |     |     |     |      | 59                        |
|            |                  |              | sequences, n | 11  | 15  | 24  | 9   |     |     |     |     |     |      |                           |
| B005511-6  | QG               | V            | days p/s     | 48  | 229 | 415 |     |     |     |     |     |     |      | 6                         |
|            |                  |              | sequences, n | 1   | 2   | 3   |     |     |     |     |     |     |      |                           |
| B005582-7  | H                | II           | days p/s     | 16  | 55  | 98  | 202 | 271 | 347 |     |     |     |      | 88                        |
|            |                  |              | sequences, n | 9   | 20  | 19  | 19  | 7   | 14  |     |     |     |      |                           |
| B005715-8  | QI               | IV           | days p/s     | 20  | 204 | 322 | 384 | 476 |     |     |     |     |      | 44                        |
|            |                  |              | sequences, n | 10  | 12  | 12  | 1   | 9   |     |     |     |     |      |                           |
| B005768-1  | QJ               | IV           | days p/s     | 8   | 71  | 198 | 256 | 344 | 377 | 471 |     |     |      | 77                        |
|            |                  |              | sequences, n | 4   | 14  | 12  | 20  | 10  | 2   | 15  |     |     |      |                           |
| B005849-1  | QM               | V            | days p/s     | 48  | 239 | 357 | 415 |     |     |     |     |     |      | 21                        |
|            |                  |              | sequences, n | 6   | 2   | 6   | 7   |     |     |     |     |     |      |                           |
| B005867-9  | QP               | V            | days p/s     | 48  | 232 | 353 | 414 |     |     |     |     |     |      | 42                        |
|            |                  |              | sequences, n | 10  | 11  | 8   | 13  |     |     |     |     |     |      |                           |
| B005943-9  | QR               | IV           | days p/s     | 7   | 90  | 219 | 316 | 485 |     |     |     |     |      | 58                        |
|            |                  |              | sequences, n | 9   | 6   | 13  | 14  | 16  |     |     |     |     |      |                           |
| B006020-8  | QS               | V            | days p/s     | 44  | 169 | 232 | 292 | 351 |     |     |     |     |      | 31                        |
|            |                  |              | sequences, n | 8   | 5   | 3   | 4   | 11  |     |     |     |     |      |                           |
| B006024-2  | QT               | V            | days p/s     | 44  | 137 | 228 | 289 | 349 |     |     |     |     |      | 64                        |
|            |                  |              | sequences, n | 11  | 11  | 13  | 18  | 11  |     |     |     |     |      |                           |
| B006029-2  | QU               | V-VI         | days p/s     | 84  | 114 | 174 | 266 |     |     |     |     |     |      | 43                        |
|            |                  |              | sequences, n | 11  | 14  | 8   | 10  |     |     |     |     |     |      |                           |
| B006343-8  | RA               | V            | days p/s     | 54  | 142 | 240 | 328 | 389 | 422 |     |     |     |      | 84                        |
|            |                  |              | sequences, n | 10  | 12  | 8   | 22  | 15  | 17  |     |     |     |      |                           |
| B006380-0  | RB               | V            | days p/s     | 52  | 142 | 240 | 332 |     |     |     |     |     |      | 40                        |
|            |                  |              | sequences, n | 7   | 9   | 11  | 13  |     |     |     |     |     |      |                           |

Total: 2,438
