# Supplementary material for: Timing Constraints of In Vivo Gag Mutations during Primary HIV-1 Subtype C Infection
Source: PubMed Central journal article supplement (PMC2768328; doi:10.1371/journal.pone.0007727), 2009-11-05
Supplement: pone.0007727.s007.pdf [file pone.0007727.s007.pdf]

Fig. S7. Subject D-5018. Alignment of translated amino acids.

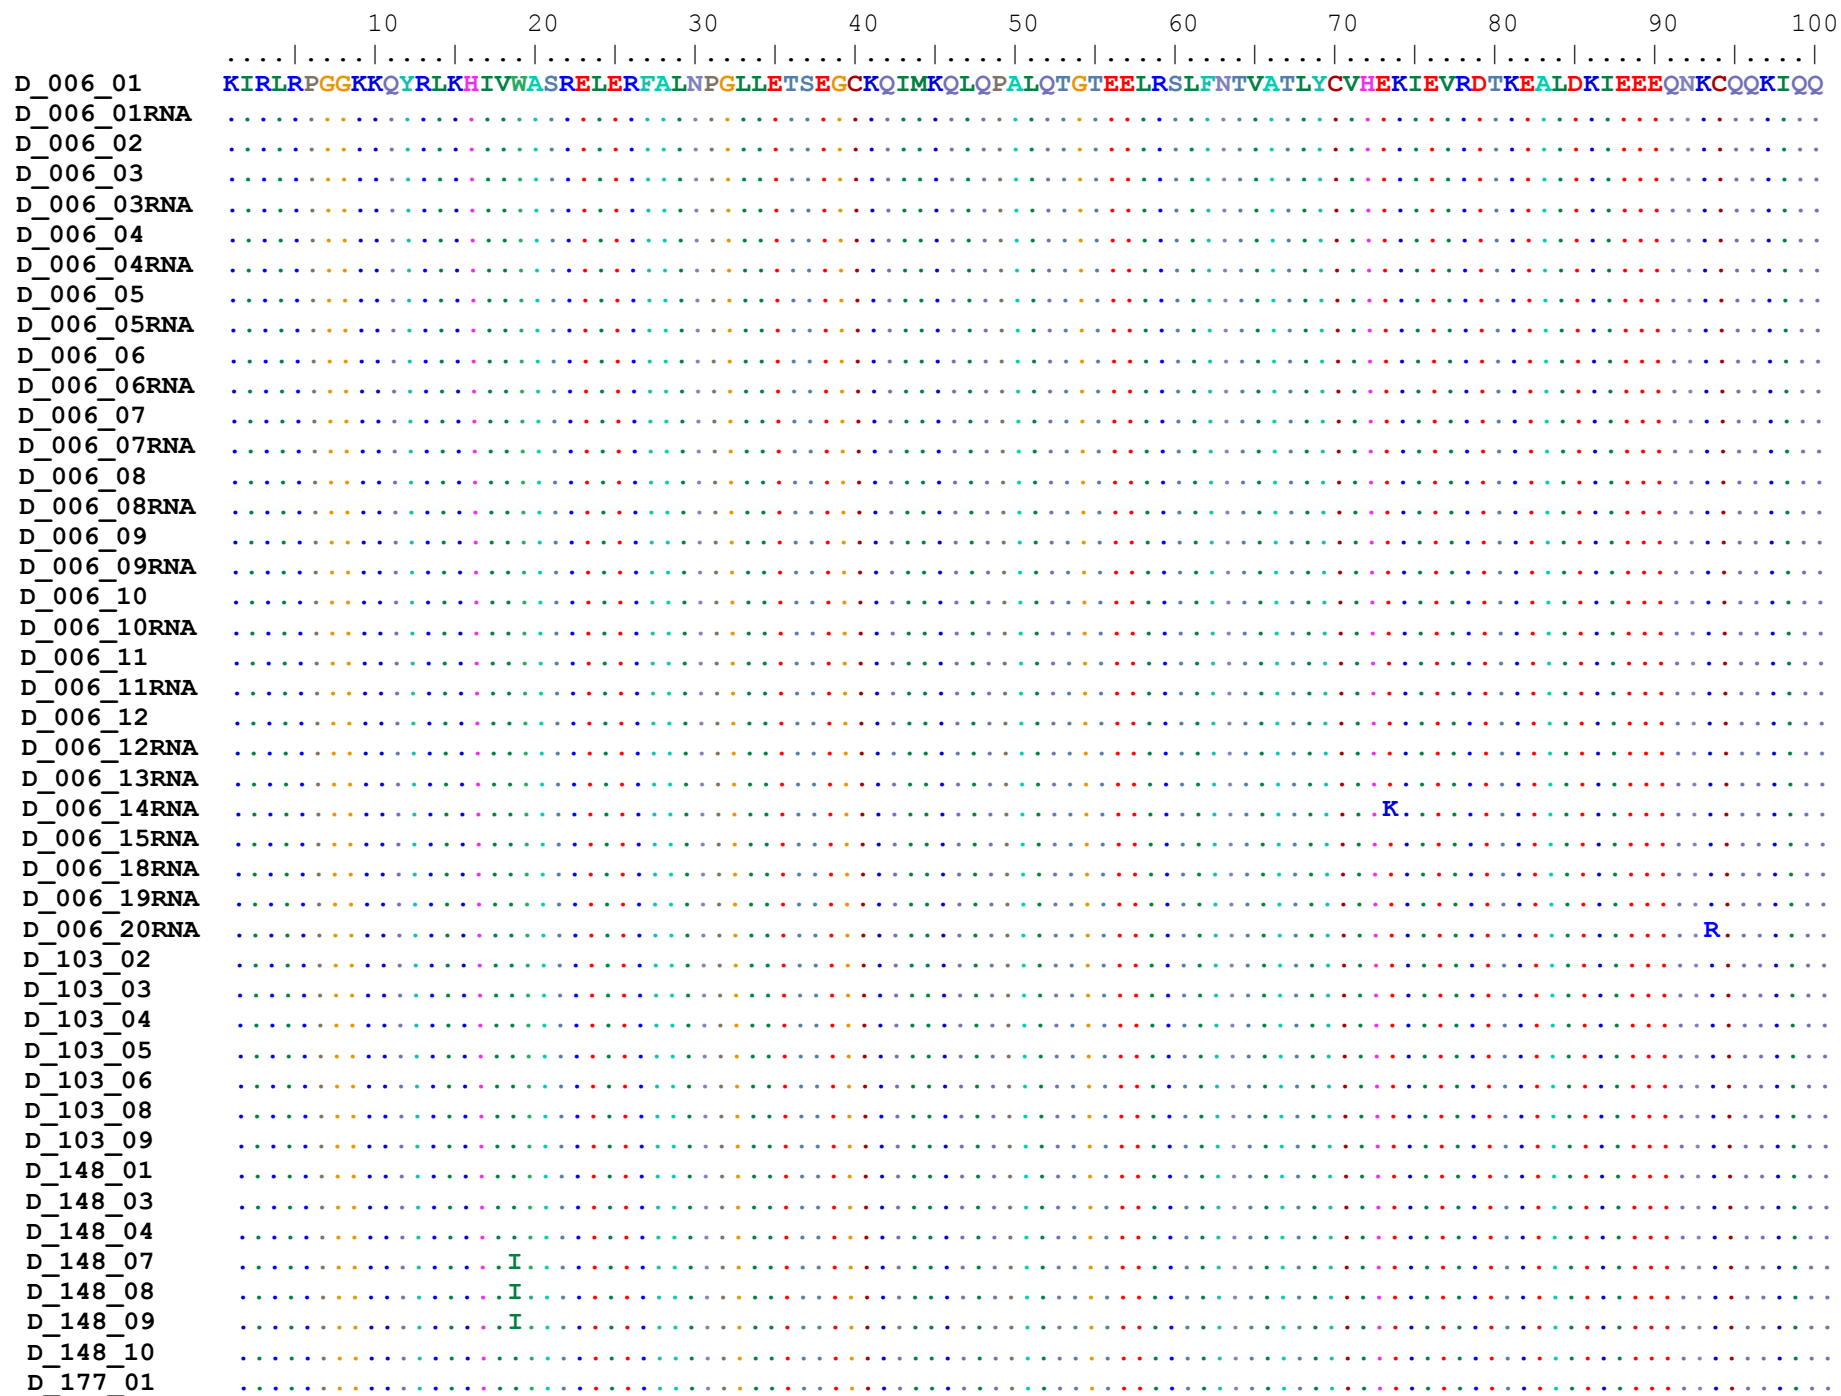

D\_177\_02  
D\_177\_03  
D\_177\_04  
D\_177\_05  
D\_177\_06  
D\_177\_07  
D\_177\_08  
D\_177\_09  
D\_301\_01  
D\_301\_03  
D\_301\_04  
D\_301\_05  
D\_301\_07  
D\_301\_08  
D\_301\_09  
D\_301\_10  
D\_301\_11  
D\_301\_12  
D\_301\_13  
D\_393\_01  
D\_393\_02  
D\_393\_03  
D\_393\_01R  
D\_393\_02R  
D\_393\_03R  
D\_393\_04R  
D\_393\_05R  
D\_393\_06R  
D\_393\_08R  
D\_393\_09R

110 120 130 140 150 160 170 180 190 200

D\_006\_01 KEAADQ GKVSHNYPIVQNLQGGMVHQAMSPRTLNAWVKVVEEKAFSP EVIPMFTALSEGATPSDLNSMLNAVGGHQAMQMLKETINDEAAEWDRVHPVH  
D\_006\_01RNA  
D\_006\_02  
D\_006\_03  
D\_006\_03RNA  
D\_006\_04  
D\_006\_04RNA  
D\_006\_05  
D\_006\_05RNA  
D\_006\_06  
D\_006\_06RNA  
D\_006\_07  
D\_006\_07RNA



D\_301\_10 .....L  
D\_301\_11 .....L  
D\_301\_12 .....P.....L  
D\_301\_13 .....P.....L  
D\_393\_01 .....  
D\_393\_02 .....P.....L  
D\_393\_03 .....  
D\_393\_01R .....T.....C.....L  
D\_393\_02R .....P.....L  
D\_393\_03R .....P.....L  
D\_393\_04R .....P.....  
D\_393\_05R .....P.....  
D\_393\_06R .....P.....  
D\_393\_08R .....P.....S.....L  
D\_393\_09R .....P.....C.....L

210 220 230 240 250 260 270 280 290 300

D\_006\_01 AGPAAPGOMREPRGSDIAGTTSTLQEQIAWMTSNPPIPVGDYKRWIVLGLNKIVRMYSPVSILDIKQGPKESFRDYVDREFFKTLRAEQSTQEVKNWMTD  
D\_006\_01RNA .....  
D\_006\_02 .....  
D\_006\_03 .....  
D\_006\_03RNA .....  
D\_006\_04 .....  
D\_006\_04RNA .....  
D\_006\_05 .....  
D\_006\_05RNA .....  
D\_006\_06 .....  
D\_006\_06RNA .....  
D\_006\_07 .....  
D\_006\_07RNA .....  
D\_006\_08 .....  
D\_006\_08RNA .....  
D\_006\_09 .....  
D\_006\_09RNA .....  
D\_006\_10 .....  
D\_006\_10RNA .....  
D\_006\_11 .....  
D\_006\_11RNA .....  
D\_006\_12 .....  
D\_006\_12RNA .....  
D\_006\_13RNA .....  
D\_006\_14RNA .....  
D\_006\_15RNA .....  
D\_006\_18RNA .....  
D\_006\_19RNA .....

D\_006\_20RNA .....  
D\_103\_02 .....  
D\_103\_03 .....  
D\_103\_04 .....  
D\_103\_05 .....  
D\_103\_06 .....  
D\_103\_08 .....  
D\_103\_09 .....  
D\_148\_01 .....  
D\_148\_03 .....  
D\_148\_04 .....  
D\_148\_07 .....  
D\_148\_08 .....  
D\_148\_09 .....  
D\_148\_10 .....  
D\_177\_01 .....  
D\_177\_02 .....  
D\_177\_03 .....  
D\_177\_04 .....  
D\_177\_05 .....  
D\_177\_06 .....  
D\_177\_07 .....  
D\_177\_08 .....  
D\_177\_09 .....  
D\_301\_01 .....  
D\_301\_03 .....  
D\_301\_04 .....  
D\_301\_05 .....  
D\_301\_07 .....  
D\_301\_08 ..... P .....  
D\_301\_09 .....  
D\_301\_10 ..... P .....  
D\_301\_11 .....  
D\_301\_12 ..... V .....  
D\_301\_13 ..... V .....  
D\_393\_01 .....  
D\_393\_02 .....  
D\_393\_03 .....  
D\_393\_01R ..... V .....  
D\_393\_02R .....  
D\_393\_03R ..... V .....  
D\_393\_04R ..... V ..... P .....  
D\_393\_05R ..... V ..... P .....  
D\_393\_06R ..... V .....  
D\_393\_08R .....  
D\_393\_09R .....

|             | 310   | 320   | 330   | 340  | 350 | 360   | 370   | 380 | 390  | 400 |        |      |      |       |      |     |       |      |      |     |     |      |      |      |      |
|-------------|-------|-------|-------|------|-----|-------|-------|-----|------|-----|--------|------|------|-------|------|-----|-------|------|------|-----|-----|------|------|------|------|
| D_006_01    | TLLVQ | NANPD | CKTIL | RALG | P   | GATLE | EEMMT | ACQ | GVGG | PSH | KARVLA | EAMS | QANN | PNIMI | QRGN | FKG | PRRIV | KCFN | CGKE | GHI | ARN | CRAP | RKKG | CWKC | GKEG |
| D_006_01RNA | ..... |       |       |      |     |       |       |     |      |     |        |      |      |       |      |     |       |      |      |     |     |      |      |      |      |
| D_006_02    | ..... |       |       |      |     |       |       |     |      |     |        |      |      |       |      |     |       |      |      |     |     |      |      |      |      |
| D_006_03    | ..... |       |       |      |     |       |       |     |      |     |        |      |      |       |      |     |       |      |      |     |     |      |      |      |      |
| D_006_03RNA | ..... |       |       |      |     |       |       |     |      |     |        |      |      |       |      |     |       |      |      |     |     |      |      |      |      |
| D_006_04    | ..... |       |       |      |     |       |       |     |      |     |        |      |      |       |      |     |       |      |      |     |     |      |      |      |      |
| D_006_04RNA | ..... |       |       |      |     |       |       |     |      |     |        |      |      |       |      |     |       |      |      |     |     |      |      |      |      |
| D_006_05    | ..... |       |       |      |     |       |       |     |      |     |        |      |      |       |      |     |       |      |      |     |     |      |      |      |      |
| D_006_05RNA | ..... |       |       |      |     |       |       |     |      |     |        |      |      |       |      |     |       |      |      |     |     |      |      |      |      |
| D_006_06    | ..... |       |       |      |     |       |       |     |      |     |        |      |      |       |      |     |       |      |      |     |     |      |      |      |      |
| D_006_06RNA | ..... |       |       |      |     |       |       |     |      |     |        |      |      |       |      |     |       |      |      |     |     |      |      |      |      |
| D_006_07    | ..... |       |       |      |     |       |       |     |      |     |        |      |      |       |      |     |       |      |      |     |     |      |      |      |      |
| D_006_07RNA | ..... |       |       |      |     |       |       |     |      |     |        |      |      |       |      |     |       |      |      |     |     |      |      |      |      |
| D_006_08    | ..... |       |       |      |     |       |       |     |      |     |        |      |      |       |      |     |       |      |      |     |     |      |      |      |      |
| D_006_08RNA | ..... |       |       |      |     |       |       |     |      |     |        |      |      |       |      |     |       |      |      |     |     |      |      |      |      |
| D_006_09    | ..... |       |       |      |     |       |       |     |      |     |        |      |      |       |      |     |       |      |      |     |     |      |      |      |      |
| D_006_09RNA | ..... |       |       |      |     |       |       |     |      |     |        |      |      |       |      |     |       |      |      |     |     |      |      |      |      |
| D_006_10    | ..... |       |       |      |     |       |       |     |      |     |        |      |      |       |      |     |       |      |      |     |     |      |      |      |      |
| D_006_10RNA | ..... |       |       |      |     |       |       |     |      |     |        |      |      |       |      |     |       |      |      |     |     |      |      |      |      |
| D_006_11    | ..... |       |       |      |     |       |       |     |      |     |        |      |      |       |      |     |       |      |      |     |     |      |      |      |      |
| D_006_11RNA | ..... |       |       |      |     |       |       |     |      |     |        |      |      |       |      |     |       |      |      |     |     |      |      |      |      |
| D_006_12    | ..... |       |       |      |     |       |       |     |      |     |        |      |      |       |      |     |       |      |      |     |     |      |      |      |      |
| D_006_12RNA | ..... |       |       |      |     |       |       |     |      |     |        |      |      |       |      |     |       |      |      |     |     |      |      |      |      |
| D_006_13RNA | ..... |       |       |      |     |       |       |     |      |     |        |      |      |       |      |     |       |      |      |     |     |      |      |      |      |
| D_006_14RNA | ..... |       |       |      |     |       |       |     |      |     |        |      |      |       |      |     |       |      |      |     |     |      |      |      |      |
| D_006_15RNA | ..... |       |       |      |     |       |       |     |      |     |        |      |      |       |      |     |       |      |      |     |     |      |      |      |      |
| D_006_18RNA | ..... |       |       |      |     |       |       |     |      |     |        |      |      |       |      |     |       |      |      |     |     |      |      |      |      |
| D_006_19RNA | ..... |       |       |      |     |       |       |     |      |     |        |      |      |       |      |     |       |      |      |     |     |      |      |      |      |
| D_006_20RNA | ..... |       |       |      |     |       |       |     |      |     |        |      |      |       |      |     |       |      |      |     |     |      |      |      |      |
| D_103_02    | ..... |       |       |      |     |       |       |     |      |     |        |      |      |       |      |     |       |      |      |     |     |      |      |      |      |
| D_103_03    | ..... |       |       |      |     |       |       |     |      |     |        |      |      |       |      |     |       |      |      |     |     |      |      |      |      |
| D_103_04    | ..... |       |       |      |     |       |       |     |      |     |        |      |      |       |      |     |       |      |      |     |     |      |      |      |      |
| D_103_05    | ..... |       |       |      |     |       |       |     |      |     |        |      |      |       |      |     |       |      |      |     |     |      |      |      |      |
| D_103_06    | ..... |       |       |      |     |       |       |     |      |     |        |      |      |       |      |     |       |      |      |     |     |      |      |      |      |
| D_103_08    | ..... |       |       |      |     |       |       |     |      |     |        |      |      |       |      |     |       |      |      |     |     |      |      |      |      |
| D_103_09    | ..... |       |       |      |     |       |       |     |      |     |        |      |      |       |      |     |       |      |      |     |     |      |      |      |      |
| D_148_01    | ..... |       |       |      |     |       |       |     |      |     |        |      |      |       |      |     |       |      |      |     |     |      |      |      |      |
| D_148_03    | ..... |       |       |      |     |       |       |     |      |     |        |      |      |       |      |     |       |      |      |     |     |      |      |      |      |
| D_148_04    | ..... |       |       |      |     |       |       |     |      |     |        |      |      |       |      |     |       |      |      |     |     |      |      |      |      |
| D_148_07    | ..... |       |       |      |     |       |       |     |      |     |        |      |      |       |      |     |       |      |      |     |     |      |      |      |      |
| D_148_08    | ..... |       |       |      |     |       |       |     |      |     |        |      |      |       |      |     |       |      |      |     |     |      |      |      |      |
| D_148_09    | ..... |       |       |      |     |       |       |     |      |     |        |      |      |       |      |     |       |      |      |     |     |      |      |      |      |
| D_148_10    | ..... |       |       |      |     |       |       |     |      |     |        |      |      |       |      |     |       |      |      |     |     |      |      |      |      |







D\_301\_09 .....  
D\_301\_10 .....P.....  
D\_301\_11 .....  
D\_301\_12 .....P.....  
D\_301\_13 .....P.....  
D\_393\_01 .....  
D\_393\_02 .....P.....  
D\_393\_03 .....  
D\_393\_01R .....P.....  
D\_393\_02R .....N.....  
D\_393\_03R .....P.....  
D\_393\_04R .....N.P.....T.....  
D\_393\_05R .....P.....  
D\_393\_06R .....P.....  
D\_393\_08R .....P.....  
D\_393\_09R .....  
.....
