# Supplementary material for: Timing Constraints of In Vivo Gag Mutations during Primary HIV-1 Subtype C Infection
Source: PubMed Central journal article supplement (PMC2768328; doi:10.1371/journal.pone.0007727), 2009-11-05
Supplement: pone.0007727.s008.pdf [file pone.0007727.s008.pdf]

Fig. S8. Subject E-3430. Alignment of translated amino acids.

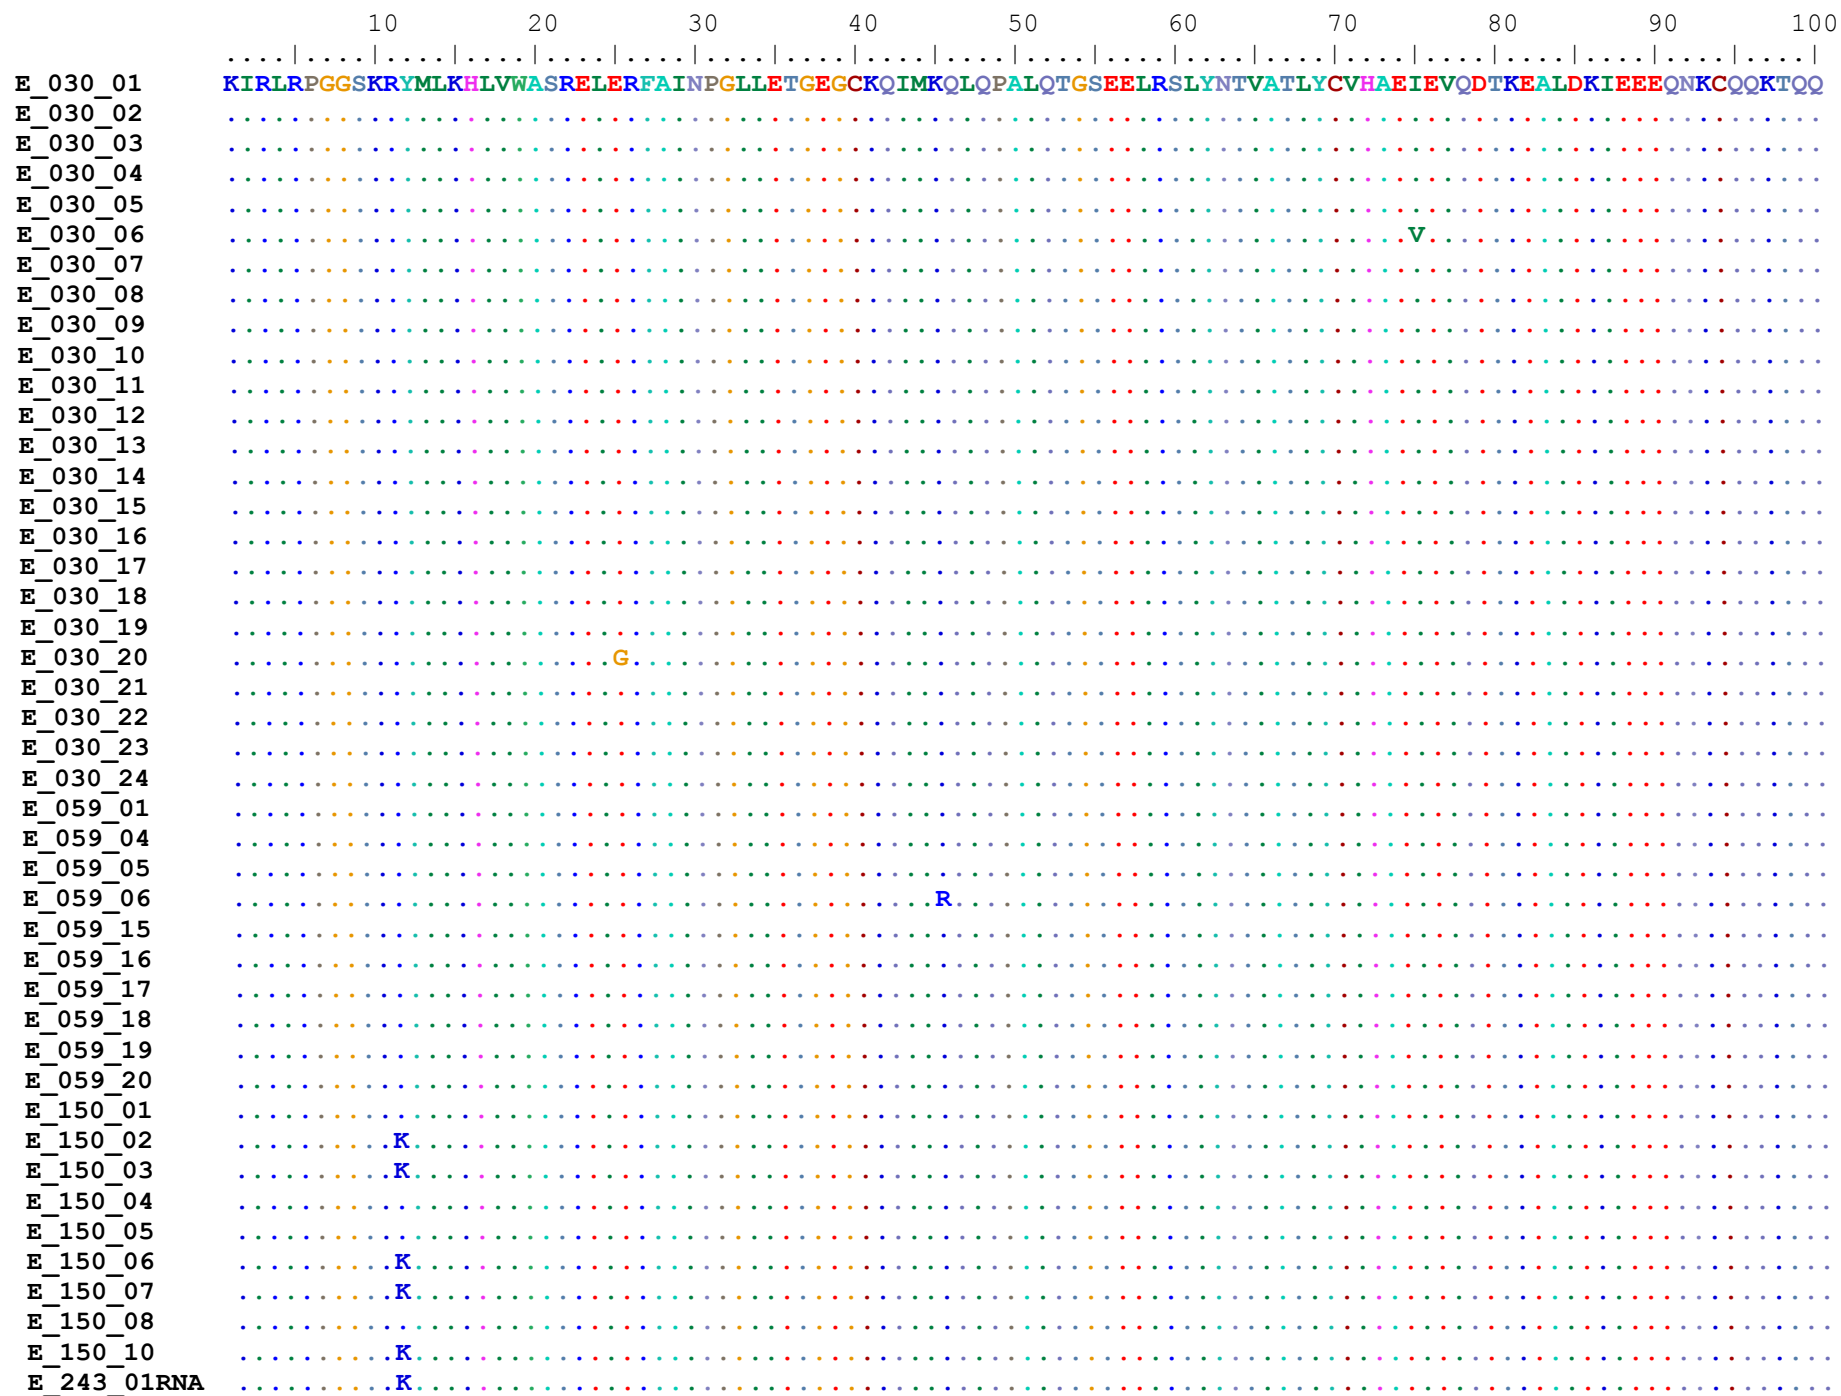

|             |               |   |
|-------------|---------------|---|
| E_243_02RNA | .....K.....   |   |
| E_243_03RNA | .....K.....   |   |
| E_243_04RNA | .....K.....   | G |
| E_243_05RNA | .....K.....   | G |
| E_243_06RNA | .K.....K..... |   |
| E_274_01    | .....K.....   |   |
| E_274_02    | .....K.....   | G |
| E_274_03    | .....K.....   |   |
| E_274_04    | .....K.....   | G |
| E_274_05    | .....K.....   |   |
| E_274_06    | .....K.....   | G |
| E_274_07    | .....K.....   | G |
| E_274_08    | .....K.....   | S |
| E_274_09    | .....K.....   |   |
| E_274_10    | .....K.....   | G |
| E_305_01    | .....K.....   | G |
| E_305_02    | .....K.....   |   |
| E_305_03    | .....K.....   | G |
| E_305_04    | .....K.....   | G |
| E_305_05    | .....K.....   |   |
| E_305_06    | .....K.....   | G |
| E_305_07    | .....K.....   | G |
| E_305_08    | .....K.....   |   |
| E_305_09    | .....K.....   | G |
| E_305_10    | .....K.....   | G |
| E_339_01    | .....K.....   |   |
| E_339_02    | .....K.....   | G |
| E_339_03    | .....K.....   | G |
| E_339_05    | .....K.....   |   |
| E_339_06    | .....K.....   |   |
| E_339_07    | .K.....K..... | G |
| E_339_09    | .....K.....   |   |
| E_339_10    | .....K.....   |   |
| E_404_01    | .....K.....   | G |
| E_404_02    | .....K.....   | G |
| E_404_03    | .....K.....   | G |
| E_404_04    | .....K.....   | G |
| E_404_04RNA | .....K.....   | I |
| E_404_05    | .....K.....   |   |
| E_404_05RNA | .....K.....   | G |
| E_404_06    | .....K.....   | G |
| E_404_07    | .K.....K..... |   |
| E_404_09    | .....K.....   | G |
| E_404_09RNA | .....K.....   | R |
| E_404_10    | .....K.....   | G |
| E_404_10RNA | .K.....K..... | G |

E\_404\_12RNA .....K.....E.....R.....G.....  
 E\_404\_13RNA ..K.....K.....  
 E\_404\_14RNA .....K.....G.....  
 E\_404\_15RNA .....K.....G.....  
 E\_404\_16RNA .....K.....G.....  
 E\_404\_17RNA .....K.....G.....  
 E\_404\_18RNA .....K.....G.....  
 E\_404\_19RNA .....N.K.....R.....G.....  
 E\_404\_20RNA .....K.....

.....110.....120.....130.....140.....150.....160.....170.....180.....190.....200.....

E\_030\_01 AKEADGKVSQNYPIVONLQGMVHQALSPRTLNAWVKVIEEKGFNPEVIPMFTALSEGATPQDLNLTMLNTVGGHQAAOMLKDITINEEAAEWDRLHPVHA  
 E\_030\_02 .....  
 E\_030\_03 .....  
 E\_030\_04 .....  
 E\_030\_05 .....  
 E\_030\_06 .....H.....P.....  
 E\_030\_07 .....  
 E\_030\_08 .....  
 E\_030\_09 .....  
 E\_030\_10 .....  
 E\_030\_11 .....  
 E\_030\_12 .....  
 E\_030\_13 .....  
 E\_030\_14 .....  
 E\_030\_15 .....  
 E\_030\_16 .....  
 E\_030\_17 .....  
 E\_030\_18 .....  
 E\_030\_19 .....  
 E\_030\_20 .....  
 E\_030\_21 .....  
 E\_030\_22 .....  
 E\_030\_23 .....  
 E\_030\_24 .....  
 E\_059\_01 .....  
 E\_059\_04 .....  
 E\_059\_05 .....  
 E\_059\_06 .....  
 E\_059\_15 .....  
 E\_059\_16 .....  
 E\_059\_17 .....  
 E\_059\_18 .....  
 E\_059\_19 .....  
 E\_059\_20 .....

E\_150\_01 .....  
E\_150\_02 .....  
E\_150\_03 .....  
E\_150\_04 .....  
E\_150\_05 .....  
E\_150\_06 .....  
E\_150\_07 .....  
E\_150\_08 .....  
E\_150\_10 ..... L .....  
E\_243\_01RNA ..... L ..... S .....  
E\_243\_02RNA .....  
E\_243\_03RNA ..... L .....  
E\_243\_04RNA ..... L .....  
E\_243\_05RNA ..... L .....  
E\_243\_06RNA ..... L .....  
E\_274\_01 ..... L .....  
E\_274\_02 ..... L .....  
E\_274\_03 ..... L .....  
E\_274\_04 ..... L .....  
E\_274\_05 ..... L .....  
E\_274\_06 ..... L .....  
E\_274\_07 ..... L .....  
E\_274\_08 ..... L .....  
E\_274\_09 ..... L .....  
E\_274\_10 ..... L .....  
E\_305\_01 ..... L .....  
E\_305\_02 ..... L .....  
E\_305\_03 ..... L .....  
E\_305\_04 ..... L .....  
E\_305\_05 ..... L .....  
E\_305\_06 ..... L .....  
E\_305\_07 ..... L .....  
E\_305\_08 ..... L .....  
E\_305\_09 ..... L .....  
E\_305\_10 ..... L .....  
E\_339\_01 ..... L .....  
E\_339\_02 ..... L .....  
E\_339\_03 ..... L .....  
E\_339\_05 ..... L .....  
E\_339\_06 ..... L .....  
E\_339\_07 ..... L .....  
E\_339\_09 ..... L .....  
E\_339\_10 ..... L .....  
E\_404\_01 ..... L .....  
E\_404\_02 ..... L .....  
E\_404\_03 ..... L .....

E\_404\_04 .....L.....  
E\_404\_04RNA .....L.....  
E\_404\_05 .....L.....  
E\_404\_05RNA .....L.....  
E\_404\_06 .....L.....  
E\_404\_07 .....L.....  
E\_404\_09 .....L.....  
E\_404\_09RNA .....L.....  
E\_404\_10 .....L.....  
E\_404\_10RNA .....L.....  
E\_404\_12RNA .....L.....  
E\_404\_13RNA .....L.....  
E\_404\_14RNA .....L.....  
E\_404\_15RNA .....L.....  
E\_404\_16RNA .....L.....  
E\_404\_17RNA .....L.....  
E\_404\_18RNA .....L.....  
E\_404\_19RNA .....L.....  
E\_404\_20RNA .....L.....

210 220 230 240 250 260 270 280 290 300  
.....|.....|.....|.....|.....|.....|.....|.....|.....|.....|.....|.....|.....|.....|.....|

E\_030\_01 GPAAPGQIREPRGSDIAGTTSTLQEQIAWMTNPAIPVGDYKRWILGLNKIVRMYSILDIKQGPKEPFRDYVDRFFKTLRAEQATQDVKNWMTDT  
E\_030\_02 .....  
E\_030\_03 .....  
E\_030\_04 .....  
E\_030\_05 .....  
E\_030\_06 .....A.....  
E\_030\_07 .....  
E\_030\_08 .....  
E\_030\_09 .....  
E\_030\_10 .....  
E\_030\_11 .....  
E\_030\_12 .....  
E\_030\_13 .....  
E\_030\_14 .....  
E\_030\_15 .....  
E\_030\_16 .....  
E\_030\_17 .....  
E\_030\_18 .....  
E\_030\_19 .....  
E\_030\_20 .....  
E\_030\_21 .....  
E\_030\_22 .....  
E\_030\_23 .....  
E\_030\_24 .....

E\_059\_01  
E\_059\_04  
E\_059\_05  
E\_059\_06  
E\_059\_15  
E\_059\_16  
E\_059\_17  
E\_059\_18  
E\_059\_19  
E\_059\_20  
E\_150\_01  
E\_150\_02  
E\_150\_03  
E\_150\_04  
E\_150\_05  
E\_150\_06  
E\_150\_07  
E\_150\_08  
E\_150\_10  
E\_243\_01RNA  
E\_243\_02RNA  
E\_243\_03RNA  
E\_243\_04RNA  
E\_243\_05RNA  
E\_243\_06RNA  
E\_274\_01  
E\_274\_02  
E\_274\_03  
E\_274\_04  
E\_274\_05  
E\_274\_06  
E\_274\_07  
E\_274\_08  
E\_274\_09  
E\_274\_10  
E\_305\_01  
E\_305\_02  
E\_305\_03  
E\_305\_04  
E\_305\_05  
E\_305\_06  
E\_305\_07  
E\_305\_08  
E\_305\_09  
E\_305\_10  
E\_339\_01

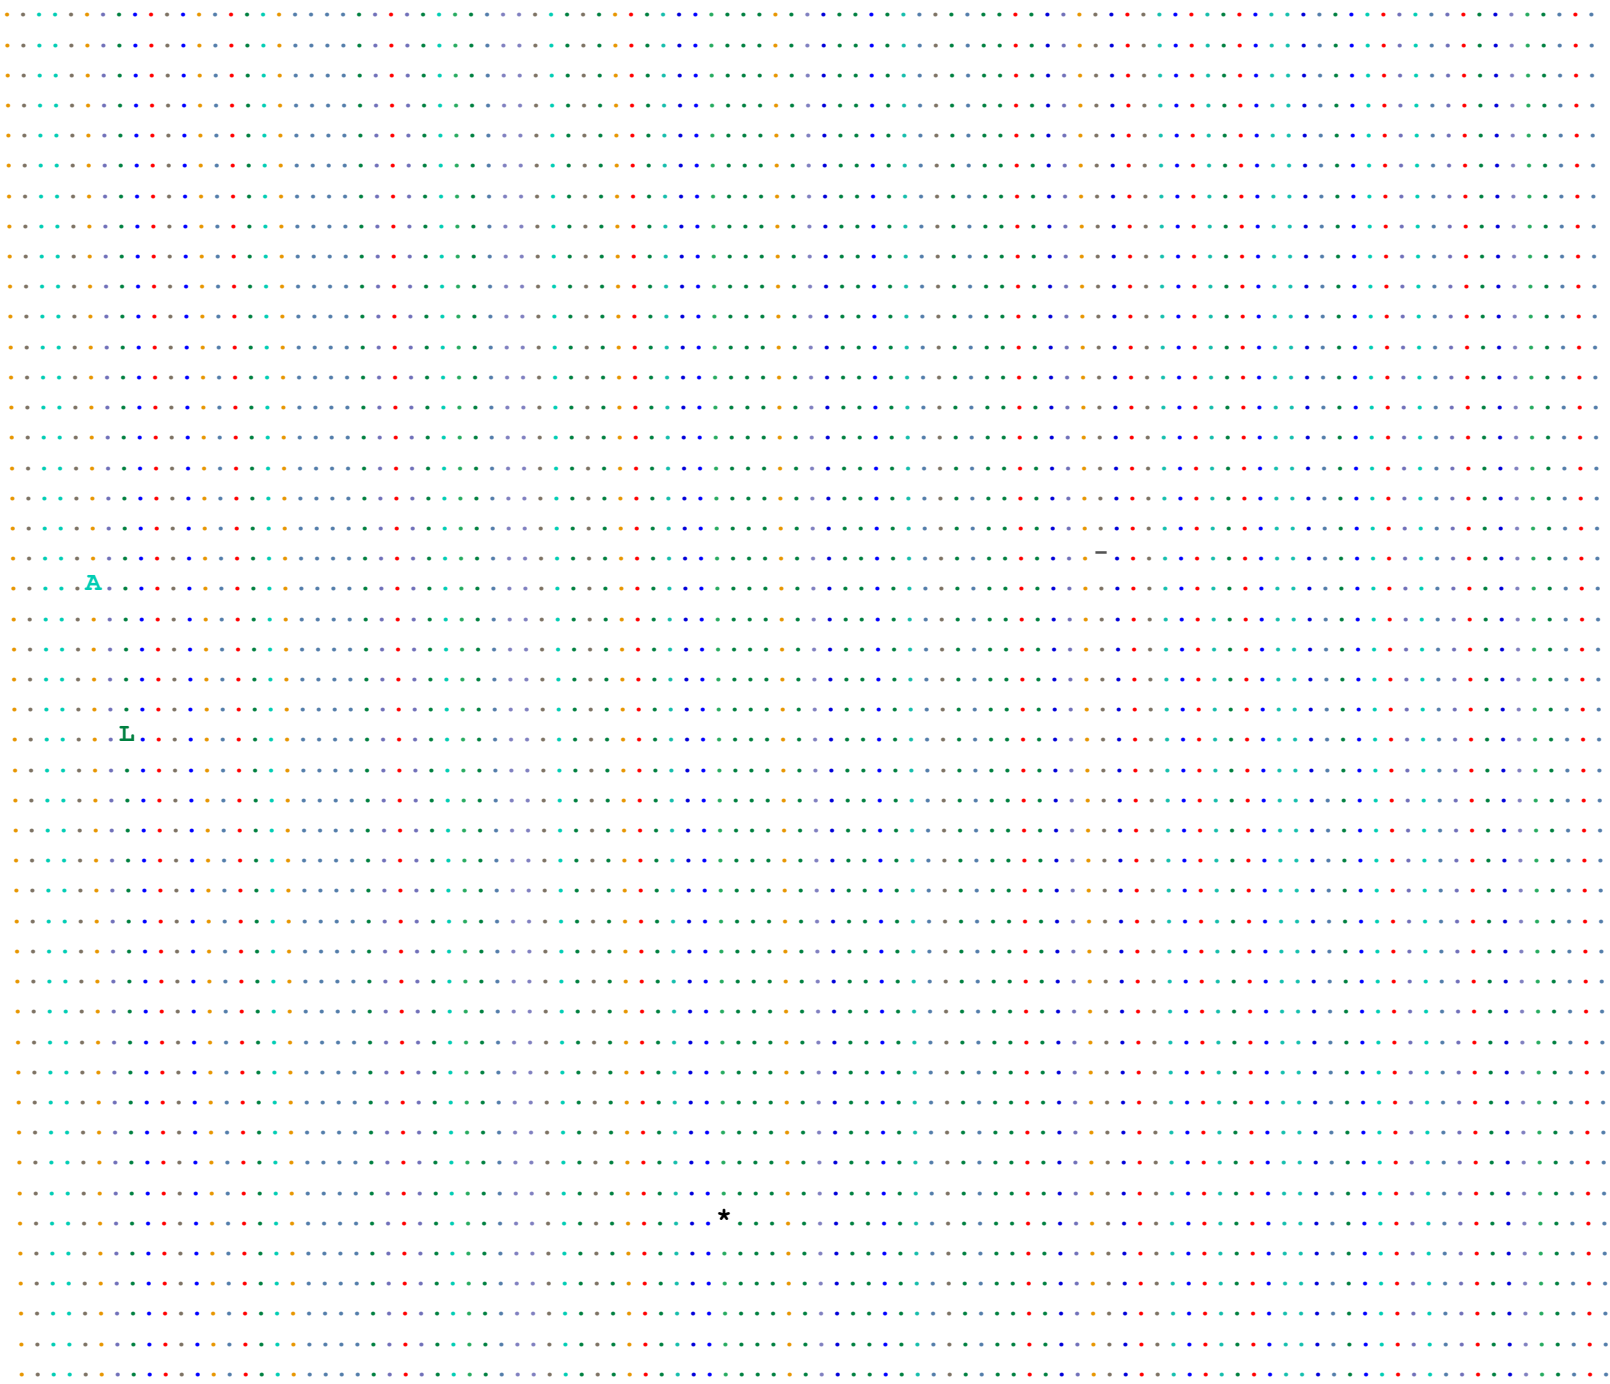



|             |     |   |     |     |
|-------------|-----|---|-----|-----|
| E_030_15    | A   |   |     | KC  |
| E_030_16    | A   |   |     | K   |
| E_030_17    | A   |   |     | K   |
| E_030_18    | A   |   |     | KC  |
| E_030_19    | A   |   |     |     |
| E_030_20    | A   |   |     | K   |
| E_030_21    | A   |   |     | K S |
| E_030_22    | A   |   |     | K   |
| E_030_23    | A   |   |     | K   |
| E_030_24    | A   |   |     | K   |
| E_059_01    | A   |   |     | K   |
| E_059_04    | A   |   |     | K   |
| E_059_05    | A   |   |     | K   |
| E_059_06    | A   |   |     | K   |
| E_059_15    | A   |   |     | K   |
| E_059_16    | A   |   |     | K   |
| E_059_17    | A   |   |     | K   |
| E_059_18    | A   |   |     | KC  |
| E_059_19    | A   |   |     | K   |
| E_059_20    | A   |   |     | K   |
| E_150_01    | A   |   |     |     |
| E_150_02    | A   |   | K   |     |
| E_150_03    | A   |   | K   | K   |
| E_150_04    | A   |   |     |     |
| E_150_05    | A   |   |     | K   |
| E_150_06    | A   |   | K   |     |
| E_150_07    | A   | A |     | K   |
| E_150_08    | A   |   |     | K   |
| E_150_10    | A   |   |     | K   |
| E_243_01RNA | A   |   | H   | K   |
| E_243_02RNA | A   |   | H S | K   |
| E_243_03RNA | A   |   | K   | K   |
| E_243_04RNA | A   |   | H   | K   |
| E_243_05RNA | A   |   |     | K   |
| E_243_06RNA | A   |   | H S | K   |
| E_274_01    | R A |   | A   | K   |
| E_274_02    | A   |   | A   | K   |
| E_274_03    | A   |   | H S | K   |
| E_274_04    | A   |   | A   | K   |
| E_274_05    | A   | A | K   | K   |
| E_274_06    | A   |   | A   | K   |
| E_274_07    | A   |   | K   | K   |
| E_274_08    | A   |   | K   | K   |
| E_274_09    | A   |   |     | K   |
| E_274_10    | A   |   | A   | K   |
| E_305_01    | A   |   | A   | K   |





E\_030\_05  
E\_030\_06  
E\_030\_07  
E\_030\_08  
E\_030\_09  
E\_030\_10  
E\_030\_11  
E\_030\_12  
E\_030\_13  
E\_030\_14  
E\_030\_15  
E\_030\_16  
E\_030\_17  
E\_030\_18  
E\_030\_19  
E\_030\_20  
E\_030\_21  
E\_030\_22  
E\_030\_23  
E\_030\_24  
E\_059\_01  
E\_059\_04  
E\_059\_05  
E\_059\_06  
E\_059\_15  
E\_059\_16  
E\_059\_17  
E\_059\_18  
E\_059\_19  
E\_059\_20  
E\_150\_01  
E\_150\_02  
E\_150\_03  
E\_150\_04  
E\_150\_05  
E\_150\_06  
E\_150\_07  
E\_150\_08  
E\_150\_10  
E\_243\_01RNA  
E\_243\_02RNA  
E\_243\_03RNA  
E\_243\_04RNA  
E\_243\_05RNA  
E\_243\_06RNA  
E\_274\_01

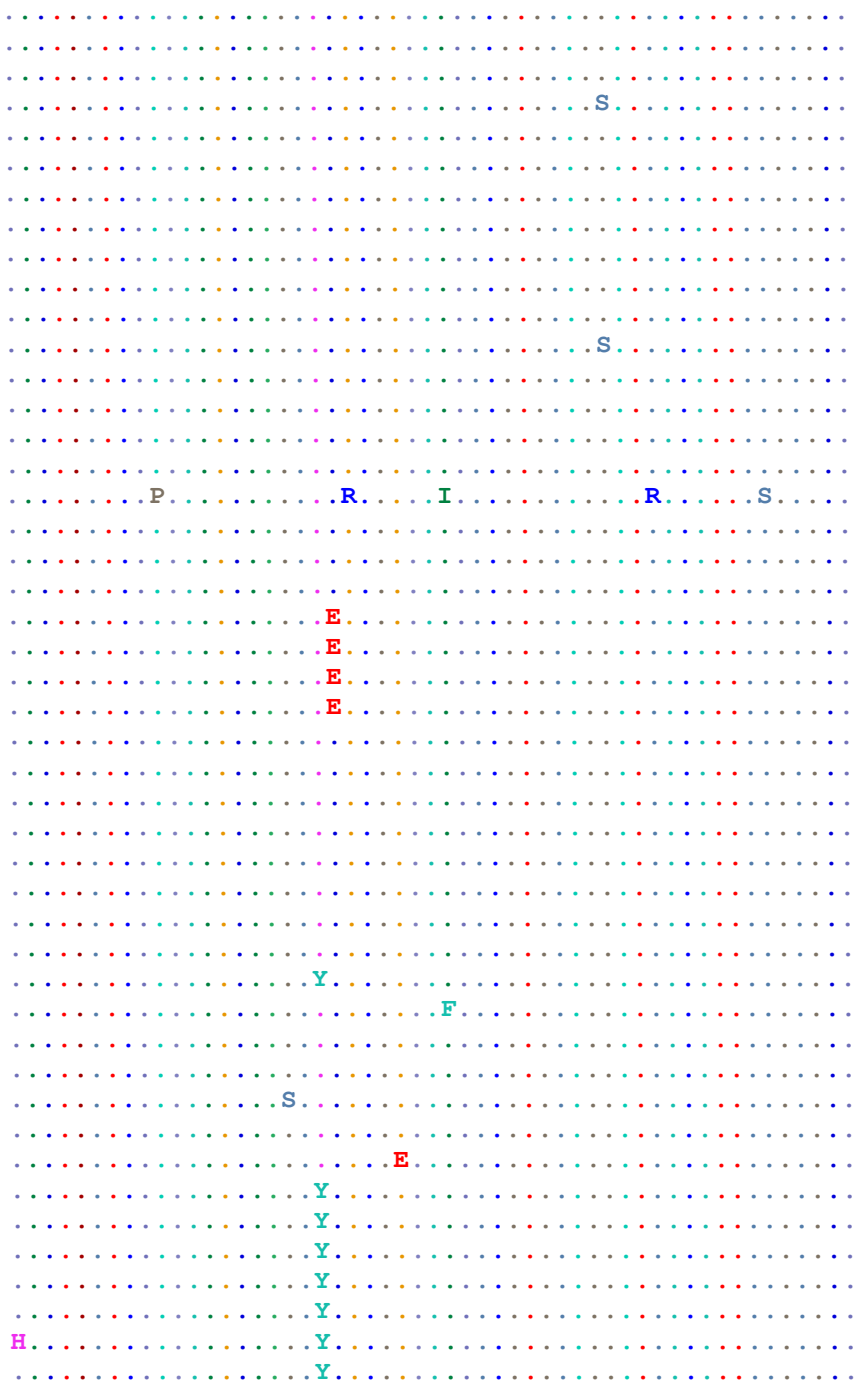

|             |             |
|-------------|-------------|
| E_274_02    | .....Y..... |
| E_274_03    | .....Y..... |
| E_274_04    | .....Y..... |
| E_274_05    | .....Y..... |
| E_274_06    | .....Y..... |
| E_274_07    | .....Y..... |
| E_274_08    | .....Y..... |
| E_274_09    | .....Y..... |
| E_274_10    | .....Y..... |
| E_305_01    | .....Y..... |
| E_305_02    | .....Y..... |
| E_305_03    | .....Y..... |
| E_305_04    | .....Y..... |
| E_305_05    | .....S..... |
| E_305_06    | .....Y..... |
| E_305_07    | .....Y..... |
| E_305_08    | .....Y..... |
| E_305_09    | .....Y..... |
| E_305_10    | .....Y..... |
| E_339_01    | .....Y..... |
| E_339_02    | .....Y..... |
| E_339_03    | .....Y..... |
| E_339_05    | .....Y..... |
| E_339_06    | .....Y..... |
| E_339_07    | .....Y..... |
| E_339_09    | .....Y..... |
| E_339_10    | .....Y..... |
| E_404_01    | .....Y..... |
| E_404_02    | .....Y..... |
| E_404_03    | .....Y..... |
| E_404_04    | .....Y..... |
| E_404_04RNA | .....Y..... |
| E_404_05    | .....Y..... |
| E_404_05RNA | .....Y..... |
| E_404_06    | .....Y..... |
| E_404_07    | .....L..... |
| E_404_09    | .....Y..... |
| E_404_09RNA | .....Y..... |
| E_404_10    | .....Y..... |
| E_404_10RNA | .....Y..... |
| E_404_12RNA | .....Y..... |
| E_404_13RNA | .....Y..... |
| E_404_14RNA | .....Y..... |
| E_404_15RNA | .....Y..... |
| E_404_16RNA | .....Y..... |
| E_404_17RNA | .....Y..... |

E\_404\_18RNA .....Y.....  
E\_404\_19RNA .....Y.....H.....  
E\_404\_20RNA .....Y.....
